# Supplementary material for: Identification of Common Oncogenic Genes and Pathways Both in Osteosarcoma and Ewing’s Sarcoma Using Bioinformatics Analysis
Source: Hindawi journal article supplement (doi:10.1155/2022/3655908), 2022-05-05

A

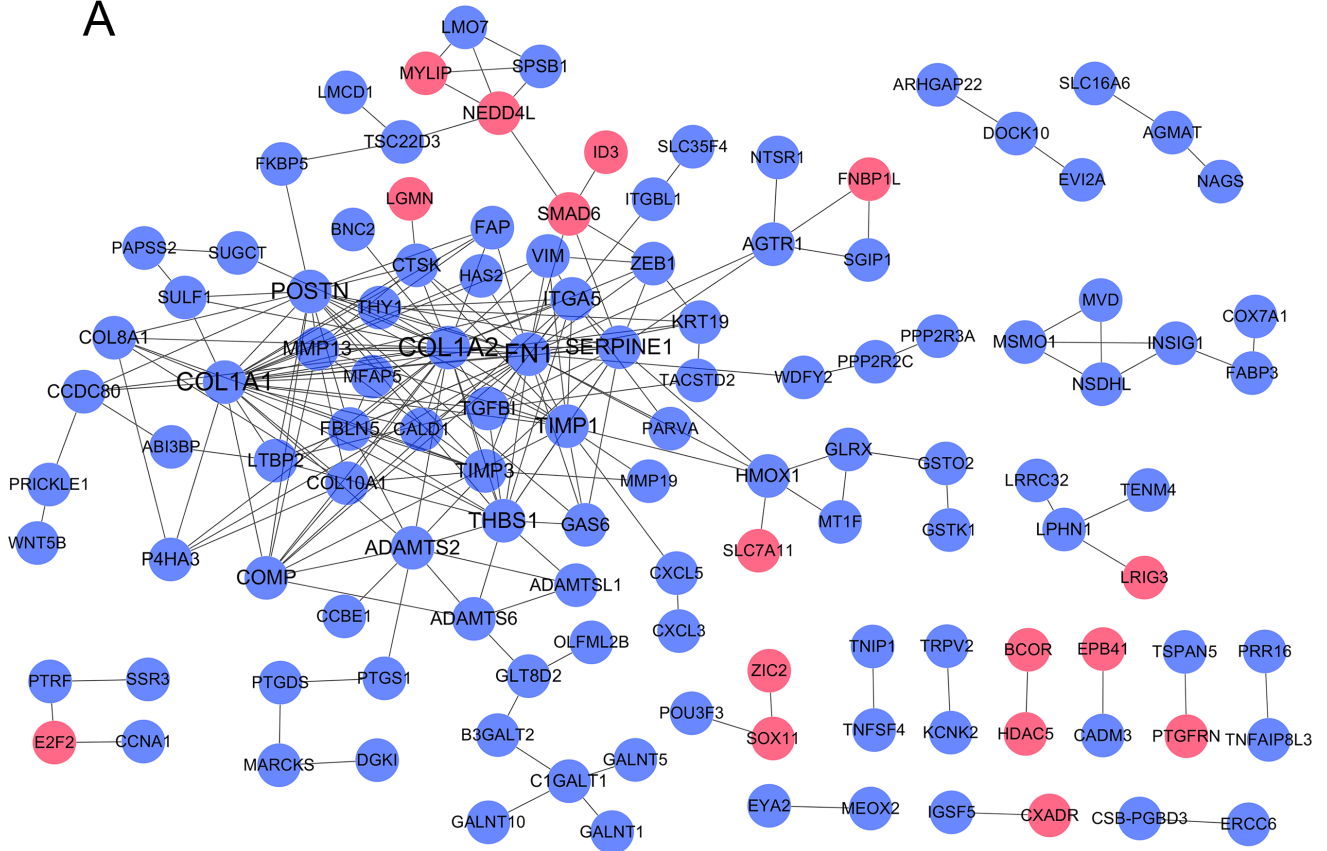

B

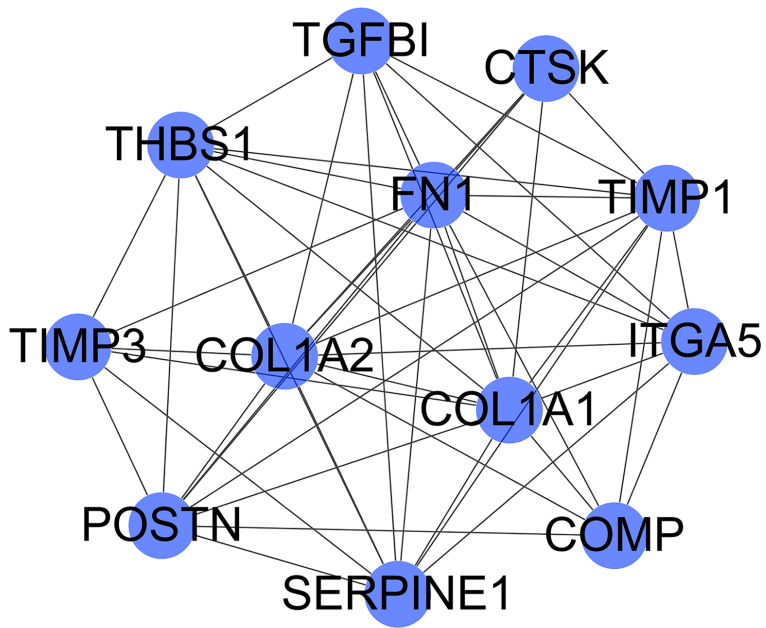

Supplement: f2 [file 3655908.f2.pdf]
