# Supplementary material for: Identification of Common Oncogenic Genes and Pathways Both in Osteosarcoma and Ewing’s Sarcoma Using Bioinformatics Analysis
Source: Hindawi journal article supplement (doi:10.1155/2022/3655908), 2022-05-05

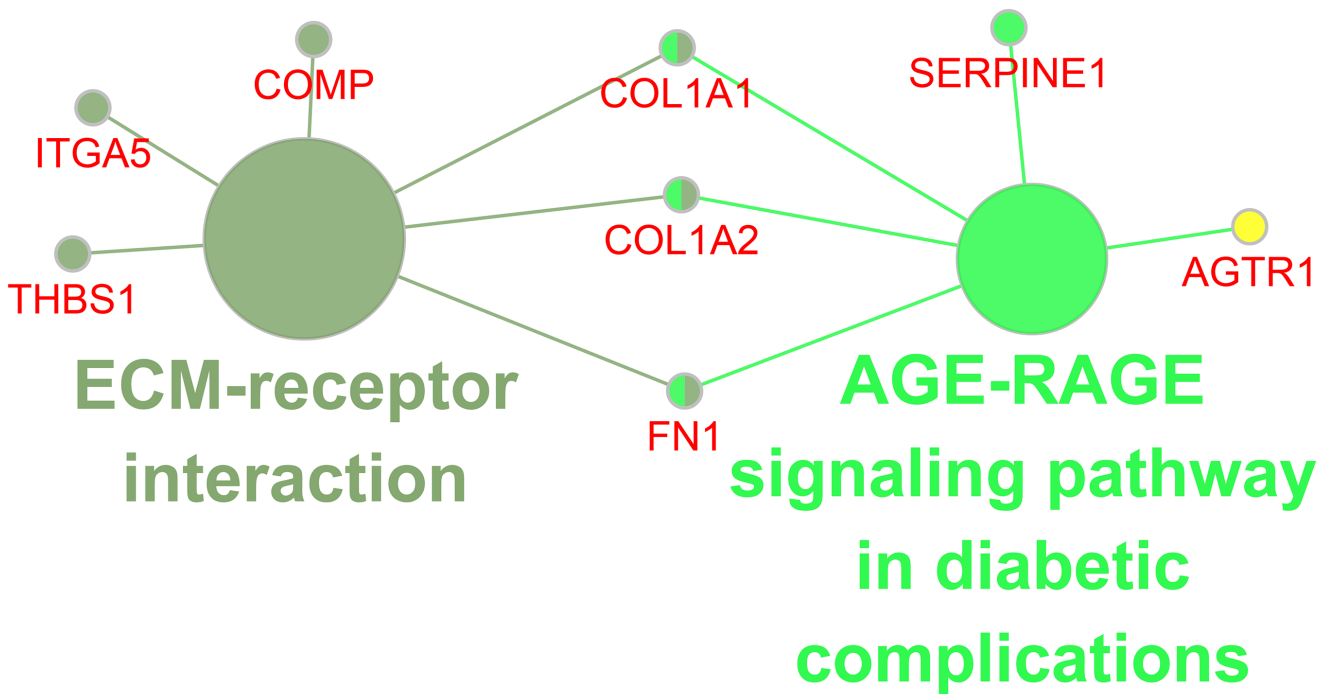

Supplement: f6 [file 3655908.f6.pdf]
