# Supplementary material for: Identification of Common Oncogenic Genes and Pathways Both in Osteosarcoma and Ewing’s Sarcoma Using Bioinformatics Analysis
Source: Hindawi journal article supplement (doi:10.1155/2022/3655908), 2022-05-05
Supplement: f7 [file 3655908.f7.pdf]

**Supplementary Table 1. The top ten up-regulated genes in osteosarcoma cells compared to mesenchymal stem cells.**

| Gene symbol  | Gene title                                        | P-value  | logFC    |
|--------------|---------------------------------------------------|----------|----------|
| LOC728613    | programmed cell death 6 pseudogene                | 0.015023 | 5.62348  |
| ZIC2         | Zic family member 2                               | 0.004358 | 5.219626 |
| CD24         | CD24 molecule                                     | 0.021227 | 5.059026 |
| ABLIM1       | actin binding LIM protein 1                       | 0.000458 | 5.011336 |
| MYLIP        | myosin regulatory light chain interacting protein | 0.0022   | 4.020656 |
| SIPA1L2      | signal induced proliferation associated 1 like 2  | 0.000255 | 3.943124 |
| RHPN2        | rhophilin Rho GTPase binding protein 2            | 0.014097 | 3.92881  |
| S100A4       | S100 calcium binding protein A4                   | 0.032193 | 3.62968  |
| LHX2         | LIM homeobox 2                                    | 0.002175 | 3.577594 |
| LOC100996740 | uncharacterized LOC100996740                      | 0.031393 | 3.551738 |
