# Supplementary material for: Identification of Common Oncogenic Genes and Pathways Both in Osteosarcoma and Ewing’s Sarcoma Using Bioinformatics Analysis
Source: Hindawi journal article supplement (doi:10.1155/2022/3655908), 2022-05-05
Supplement: f8 [file 3655908.f8.pdf]

**Supplementary Table 2. The top ten down-regulated genes in osteosarcoma cells compared to mesenchymal stem cells.**

| Gene symbol | Gene title                                             | P-value  | logFC    |
|-------------|--------------------------------------------------------|----------|----------|
| FBLN5       | fibulin 5                                              | 0.001291 | -7.41923 |
| PLD5        | phospholipase D family member 5                        | 1.91E-07 | -5.80124 |
| TRIM22      | tripartite motif containing 22                         | 8.60E-07 | -5.65307 |
| FN1         | fibronectin 1                                          | 2.26E-06 | -5.52538 |
| KCTD12      | potassium channel tetramerization domain containing 12 | 0.010454 | -5.50432 |
| CTSK        | cathepsin K                                            | 0.001203 | -5.46193 |
| ABI3BP      | ABI family member 3 binding protein                    | 3.44E-07 | -5.12252 |
| HAS2        | hyaluronan synthase 2                                  | 0.038316 | -5.02986 |
| POSTN       | periostin                                              | 2.83E-07 | -5.01706 |
| TACSTD2     | tumor-associated calcium signal transducer 2           | 2.07E-07 | -4.97786 |
