# Supplementary material for: Identification of Common Oncogenic Genes and Pathways Both in Osteosarcoma and Ewing’s Sarcoma Using Bioinformatics Analysis
Source: Hindawi journal article supplement (doi:10.1155/2022/3655908), 2022-05-05
Supplement: f9 [file 3655908.f9.pdf]

**Supplementary Table 3. KEGG pathways and enriched genes for osteosarcoma cells.**

| ID       | Description                                          | Gene symbol                                                               |
|----------|------------------------------------------------------|---------------------------------------------------------------------------|
| hsa04512 | ECM-receptor interaction                             | COL1A1/COL1A2/COMP/FN1/ITGA4/ITGA5/THBS1                                  |
| hsa04933 | AGE-RAGE signaling pathway in diabetic complications | COL1A1/COL1A2/AGTR1/FN1/SMAD3/NOX4/SERPINE1                               |
| hsa00512 | Mucin type O-glycan biosynthesis                     | GALNT5/GALNT1/GALNT10/C1GALT1                                             |
| hsa04510 | Focal adhesion                                       | COL1A1/COL1A2/COMP/FN1/ITGA4/ITGA5/PAK1/PARVA/RAC2/THBS1                  |
| hsa00100 | Steroid biosynthesis                                 | DHCR7/NSDHL/MSMO1                                                         |
| hsa05206 | MicroRNAs in cancer                                  | BCL2L11/E2F2/FOXP1/HMOX1/ITGA5/MIR34A/MARCKS/ZEB1/THBS1/TIMP3/VIM/RPS6KA5 |
| hsa04115 | p53 signaling pathway                                | DDB2/IGFBP3/SERPINE1/THBS1/TP53I3                                         |
