# Supplementary material for: Identification of Common Oncogenic Genes and Pathways Both in Osteosarcoma and Ewing’s Sarcoma Using Bioinformatics Analysis
Source: Hindawi journal article supplement (doi:10.1155/2022/3655908), 2022-05-05
Supplement: f10 [file 3655908.f10.pdf]

**Supplementary Table 4. The top ten up-regulated genes in Ewing's sarcoma cells compared to mesenchymal stem cells.**

| Gene symbol | Gene title                                                                 | P-value  | logFC    |
|-------------|----------------------------------------------------------------------------|----------|----------|
| COL6A3      | collagen type VI alpha 3 chain                                             | 4.88E-06 | -9.17661 |
| COL8A1      | collagen type VIII alpha 1 chain                                           | 2.17E-08 | -8.68956 |
| CTHRC1      | collagen triple helix repeat containing 1                                  | 0.000212 | -8.6274  |
| SRGN        | serglycin                                                                  | 0.000297 | -8.28863 |
| TGFBI       | transforming growth factor beta induced                                    | 1.41E-06 | -8.10883 |
| MICAL2      | microtubule associated monooxygenase, calponin and LIM domain containing 2 | 2.17E-06 | -8.01617 |
| ITGBL1      | integrin subunit beta like 1                                               | 6.60E-08 | -7.94664 |
| HAS2        | hyaluronan synthase 2                                                      | 6.38E-08 | -7.80376 |
| LGALS3      | lectin, galactoside binding soluble 3                                      | 1.70E-05 | -7.76557 |
| SERPINE1    | serpin family E member 1                                                   | 3.85E-06 | -7.37805 |
