# Supplementary material for: Identification of Common Oncogenic Genes and Pathways Both in Osteosarcoma and Ewing’s Sarcoma Using Bioinformatics Analysis
Source: Hindawi journal article supplement (doi:10.1155/2022/3655908), 2022-05-05
Supplement: f13 [file 3655908.f13.pdf]

**Supplementary Table 7. The genes with degree>10 in the PPI network.**

| <b>Name</b> | <b>Degree</b> | <b>Betweenness centrality</b> | <b>Closeness centrality</b> | <b>Clustering coefficient</b> | <b>Stress</b> | <b>Average shortest path length</b> |
|-------------|---------------|-------------------------------|-----------------------------|-------------------------------|---------------|-------------------------------------|
| FN1         | 28            | 0.311                         | 0.446                       | 0.238                         | 6142          | 2.241                               |
| COL1A2      | 27            | 0.162                         | 0.427                       | 0.262                         | 4216          | 2.342                               |
| COL1A1      | 26            | 0.121                         | 0.425                       | 0.277                         | 3566          | 2.354                               |
| POSTN       | 19            | 0.100                         | 0.397                       | 0.363                         | 2458          | 2.519                               |
| TIMP1       | 16            | 0.098                         | 0.397                       | 0.433                         | 2212          | 2.519                               |
| THBS1       | 15            | 0.124                         | 0.407                       | 0.486                         | 3204          | 2.456                               |
| SERPINE1    | 15            | 0.101                         | 0.407                       | 0.457                         | 2902          | 2.456                               |
| ITGA5       | 12            | 0.058                         | 0.373                       | 0.500                         | 1084          | 2.684                               |
| TIMP3       | 12            | 0.026                         | 0.376                       | 0.530                         | 1006          | 2.658                               |
| ADAMTS2     | 10            | 0.142                         | 0.351                       | 0.333                         | 4292          | 2.848                               |
| MMP13       | 10            | 0.003                         | 0.367                       | 0.756                         | 168           | 2.722                               |
| COMP        | 10            | 0.074                         | 0.393                       | 0.556                         | 2296          | 2.544                               |
