# Supplementary material for: Identification of Common Oncogenic Genes and Pathways Both in Osteosarcoma and Ewing’s Sarcoma Using Bioinformatics Analysis
Source: Hindawi journal article supplement (doi:10.1155/2022/3655908), 2022-05-05
Supplement: f14 [file 3655908.f14.pdf]

**Supplementary Table 8. Primer sequences for Real time PCR.**

| mRNAs            | 5'-3' sequences        |
|------------------|------------------------|
| FN1-F            | GGGGTCACCTATTACTTCA    |
| FN1-R            | CTCTTGGTTGCCCTTTAT     |
| COL1A2-F         | TGCCTAGCAACATGCCAATC   |
| COL1A2-R         | GCAAAGTTCCCACCGAGA     |
| COL1A1-F         | TTTGAAGCCCAAGATGTAGAAG |
| COL1A1-R         | CAGTGCTCAGCATCGGTCA    |
| POSTN-F          | GGGCAAATACTGGAAACC     |
| POSTN-R          | AGGCTGAGGAAGGTGCTA     |
| TIMP1-F          | TTCCACAGGTCCCACAAC     |
| TIMP1-R          | GCATTCCTCACAGCCAAC     |
| THBS1-F          | GACAGCATCCGCAAAGTG     |
| THBS1-R          | TATCAACAGTCCATTCCCTCGT |
| SERPINE1-F       | CTTTGGTGAAGGGTCTGC     |
| SERPINE1-R       | GGGTTTCTCCTCCTGTTGT    |
| ITGA5-F          | TCAGGAGCAGATTGCAGAA    |
| ITGA5-R          | GACATAGCCGTAAGTGAGGTT  |
| TIMP3-F          | CTGGCTACCAGTCCAAACAC   |
| TIMP3-R          | GGGAAGGGAGGGAAGTGA     |
| ADAMTS2-F        | CCAGCAGAAGCCAGACACG    |
| ADAMTS2-R        | TCTCATGGGCCACCACAAA    |
| $\beta$ -actin-F | CACAGAGCCTCGCCTTTGCC   |
| $\beta$ -actin-R | ACCCATGCCACCATCACG     |
